1 **Metagenomic characterization of soil microbial communities in the Luquillo experimental**  
2 **forest (Puerto Rico) and implications for nitrogen cycling**

3

4 Smruthi Karthikeyan<sup>1</sup>, Luis H. Orellana<sup>1</sup>, Eric R. Johnston<sup>1</sup>, Janet K. Hatt<sup>1</sup>, Frank E. Löffler<sup>3,4</sup>,  
5 Héctor L. Ayala-del-Río<sup>5</sup>, Grizelle González<sup>6</sup>, Konstantinos T Konstantinidis<sup>1,2\*</sup>

6

7 <sup>1</sup> School of Civil and Environmental Engineering, Georgia Institute of Technology, Atlanta,  
8 Georgia, USA

9 <sup>2</sup> School of Biological Sciences, Georgia Institute of Technology, Atlanta, Georgia, USA

10 <sup>3</sup> Center for Environmental Biotechnology, Department of Microbiology, Department of Civil  
11 and Environmental Engineering, Department of Biosystems Engineering and Soil Science,  
12 University of Tennessee, Knoxville, Tennessee, USA

13 <sup>4</sup> Biosciences Division, Oak Ridge National Laboratory, Oak Ridge, Tennessee, USA

14 <sup>5</sup> Department of Biology, University of Puerto Rico at Humacao, Puerto Rico, USA

15 <sup>6</sup> USDA Forest Service, International Institute of Tropical Forestry, Río Piedras, Puerto Rico,  
16 USA

17

18 \*Address correspondence to Konstantinos Konstantinidis, [kostas@ce.gatech.edu](mailto:kostas@ce.gatech.edu)

19 School of Civil & Environmental Engineering, Georgia Institute of Technology. 311 Ferst Drive,  
20 ES&T Building, Room 3321, Atlanta, GA, 30332. Telephone: 404-639-4292

21

22 The authors declare no conflict of interest.

23

24 **ABSTRACT**

25

26 The phylogenetic and functional diversity of microbial communities in tropical rainforests, and  
27 how these differ from temperate communities remain poorly described but are directly related to  
28 the increased fluxes of greenhouse gases such as nitrous oxide (N<sub>2</sub>O) from the tropics. Towards  
29 closing these knowledge gaps, we analyzed replicated shotgun metagenomes representing  
30 distinct life zones from four locations in the Luquillo Experimental Forest (LEF), Puerto Rico.  
31 These soils had a distinct microbial community composition and lower species diversity when  
32 compared to temperate grasslands or agricultural soils. Unlike temperate soils, LEF soils showed  
33 little stratification with depth in the first 0-30cm, with ~45% of community composition  
34 differences explained solely by location. The relative abundances and nucleotide sequences of  
35 N<sub>2</sub>O reductases (*nosZ*) were highly similar between tropical forest and temperate soils. However,  
36 respiratory NO reductase (*norB*) was 2-fold more abundant in the tropical soils, which might be  
37 relatable to their greater N<sub>2</sub>O emissions. Nitrogen fixation (*nifH*) also showed higher relative  
38 abundance in rainforest compared to temperate soils (20% vs. 0.1-0.3% of bacterial genomes in  
39 each soil type harbored the gene, respectively). Collectively, these results advance our  
40 understanding of spatial diversity and metabolic repertoire of tropical rainforest soil  
41 communities, and should facilitate future ecological modeling efforts.

42

43 **Importance:**

44 Tropical rainforests are the largest terrestrial sinks of atmospheric CO<sub>2</sub> and the largest natural  
45 source of N<sub>2</sub>O emissions, two critical greenhouse gases for the climate. The microbial  
46 communities of rainforest soils that directly or indirectly, through affecting plant growth,

47 contribute to these fluxes remain poorly described by cultured-independent methods. To close  
48 this knowledge gap, the present study applied shotgun metagenomics to samples selected from 3  
49 distinct life zones within the Puerto Rico rainforest. The results advance our understanding of  
50 microbial community diversity in rainforest soils and should facilitate future studies of natural or  
51 manipulated perturbations of these critical ecosystems.

52

## 53 **INTRODUCTION**

54

55 Soil microbiomes are one of the most complex ecosystems owing to microenvironments  
56 and steep physicochemical gradients, which can change on a micrometer or millimeter scale (1-  
57 3). Temporal and spatial heterogeneity, demographic stochasticity, ecotype mixing, dispersion  
58 and biotic interactions are the major drivers of soil microbial diversity in these ecosystems (4, 5).  
59 The formation of such “metacommunities” coupled with biogeography and other edaphic factors  
60 greatly influence the functional and taxonomic profile of a soil ecosystem at any given location  
61 (6).

62 Tropical rainforests (“forests” hereafter) are characterized by humid and wet climate  
63 patterns and account for a large portion of the world’s total forest cover (7). These forests have  
64 high levels of primary productivity (~30% of the total global production) due to large amounts of  
65 precipitation coupled with year-long warm temperatures and high levels of light (8).  
66 Consequently, high levels of biodiversity are observed in these forest soils with unique microbial  
67 genotypic signatures being exclusive to this habitat/location, along with only a few cosmopolitan  
68 taxa that are shared with other (non-tropical forest) habitats (9, 10). Although tropical forest soils  
69 are critical ecosystems that host a plethora of distinct ecological niches, little is known about the

70 metabolic potential of tropical soils, especially, across elevation and depth gradients. Describing  
71 this metabolic diversity is important for studying and monitoring the microbial activities related  
72 to greenhouse gas fluxes, namely, nitrous oxide (N<sub>2</sub>O) and carbon dioxide (CO<sub>2</sub>) from the  
73 tropical soils (11).

74 Notably, tropical forests represent the largest terrestrial sinks of atmospheric CO<sub>2</sub> and the  
75 largest natural source of N<sub>2</sub>O emissions (12-15). Natural soils have been reported to contribute  
76 over 43% of the total global N<sub>2</sub>O emissions, with tropical ecosystems being the highest  
77 contributors, having 2 to 4 times higher contributions compared to natural temperate ecosystems  
78 (16-19). These soils are also responsible for about 70% of terrestrial nitrogen fixation, which  
79 underlies, at least in part, their high rates of net primary productivity (11, 20).

80 Microbially-mediated nitrification and denitrification are the biotic processes contributing  
81 the most to global N<sub>2</sub>O soil emissions (60-70%) (19, 21, 22), although chemodenitrification, i.e.,  
82 ferrous iron generated by ferric iron-reducing bacteria reacting with nitrite to produce N<sub>2</sub>O  
83 abiotically, is also likely high in iron-rich tropical soils (23). In soils, N<sub>2</sub>O is biologically  
84 produced as a result of incomplete nitrification, DNRA (dissimilatory nitrite reduction to  
85 ammonium) or denitrification respiratory pathways (22, 24, 25). Respiratory nitric oxide  
86 reductase (*nor*) is a key contributor to the microbial production of N<sub>2</sub>O and is commonly  
87 encoded in the genome of denitrifying bacteria as well as some ammonia-oxidizing organisms  
88 (22, 26-30).

89 While both biotic and abiotic processes contribute to N<sub>2</sub>O production, consumption of  
90 N<sub>2</sub>O is exclusively mediated by microbial N<sub>2</sub>O reductase (NosZ) activity (31-34). Yet, whether  
91 the denitrifying microorganisms in these soils differ from their counterparts in temperate soils  
92 and, if their functional genes present in the community reflect the high nitrogen fluxes, remain

93 unanswered questions despite their apparent importance for better management and modeling of  
94 tropical soil ecosystems. It has also been demonstrated that tropical forests have significantly  
95 higher rates of nitrogen fixation (~70% of total terrestrial nitrogen fixation) compared to other  
96 ecosystems, significantly affecting the nitrogen budgets in these ecosystems (3, 35-37). For  
97 instance, higher rates of nitrogen fixation in soils have been linked to nitrous oxide emissions (N  
98 loss) due to reduced N retention capacities (11, 38, 39). How these ecosystem rates translate to  
99 the nitrogen-fixing microbial (sub)community diversity and gene potential remains unclear.

100         The Luquillo Experimental Forest (LEF), also known as the El Yunque National Forest in  
101 Puerto Rico (PR), has been a long term ecological research (LTER) site since 1988. The site is  
102 dedicated to the assessment of the effects of climate drivers on the biota and biogeochemistry.  
103 The forest has been subjected to several disturbance regimes over the last few decades, mostly  
104 natural and -to a smaller extent- anthropogenic such as tourism and experimental manipulations  
105 (40, 41). This site encompasses distinct “life zones” characterized by sharp environmental  
106 gradients even across small spatial scales (40, 42, 43). The broad life zones based on the  
107 Holdridge classification system include the rain forest, wet forest, lower montane wet forest, and  
108 lower montane rain forest. These life zones are distinguished by elevation, temperature and  
109 rainfall patterns in addition to other edaphic factors (44-47). The elevation and rainfall patterns  
110 also tend to influence oxygen availability, redox potential, nutrient uptake and organic  
111 decomposition rates (44, 47, 48). The dynamic interplay of existing physicochemical gradients  
112 and climatic factors gives rise to a complex mosaic of biodiversity patterns observed in this  
113 forest (45). Hence, LEF represents an ideal environment to study tropical microbial community  
114 diversity patterns and their impacts on carbon and nitrogen cycling. The four sampling sites of  
115 this study were chosen to represent the distinct vegetation and life zones within the LEF.

116 Previous studies in the LEF, and similar forest regions, have mostly focused on the  
117 effects of redox dynamics, litter decomposition, nitrogen (N) and other nutrient fertilization on  
118 microbial community activity through enzyme assays. Few studies have examined microbial  
119 diversity patterns across an elevation gradient and were only based on low-resolution techniques  
120 such as terminal restriction fragment length polymorphism analysis (14, 49-53). Furthermore,  
121 studies linking marker-gene abundances (related to nitrogen cycling) with *in-situ* flux  
122 measurements showed very high N<sub>2</sub>O fluxes in the forest soils (54). However, the *nosZ* primers  
123 targeted only the typical (Clade I) clades, thereby introducing a primer bias, which can be  
124 circumvented by employing metagenomic analyses.

125 With recent developments in next generation DNA sequencing and associated  
126 bioinformatics binning algorithms, near-complete metagenome-assembled genomes (MAGs) can  
127 been recovered without cultivation (55, 56), opening new windows into studying soil microbial  
128 communities. Here, shotgun metagenomes originating from soils from the four different  
129 locations/life zones and three different depths in the LEF were analyzed to describe the microbial  
130 community diversity, biogeographical patterns, and metabolic potential differences across  
131 samples. Furthermore, the metagenomic data obtained from these soils were also compared to  
132 similar data from temperate grasslands in Oklahoma (OK) (57) and agricultural soils from  
133 Illinois (IL), USA (56) obtained previously by our team. By analyzing near-complete MAGs, we  
134 show that the most abundant microbial population (based on number of reads recruited) at each  
135 of the sampling locations represent sequence-discrete populations, similar to those observed in  
136 other habitats (58). Using such sequence-discrete populations as the fundamental unit of  
137 microbial communities, we subsequently assess the population distribution at high resolution

138 across the sampling sites (biogeography) and the gene content they encoded, with a focus on  
139 nitrogen metabolism.

140

## 141 **RESULTS**

142

### 143 **Diversity of forest microbial communities**

144 The LEF soil communities were compared to those of intensively studied ecosystems,  
145 namely the Oklahoma temperate grassland (OK) (57, 59) and Illinois agricultural soils (IL) (56),  
146 which were previously characterized with similar shotgun metagenomics approaches. Shotgun  
147 metagenomic sequencing recovered a total of 370 million reads across the 4 sites (Suppl. Table  
148 S2). Nonpareil 2.0 (60) was used to estimate sequence coverage, i.e., what fraction of the total  
149 extracted community DNA was sequenced. Nonpareil analysis of community diversity (Suppl.  
150 Fig. S1) showed that the agricultural Urbana (IL) site had the highest diversity of all the soils  
151 compared (NP diversity 24.02; note that NP values are given in log scale), and consequently, the  
152 lowest sequence coverage at (only) 37.23%. El Verde and Pico del Este (20-30cm) were the least  
153 diverse or most completely sequenced with 87.1% and 73.4% coverage respectively (NP  
154 diversity of 19.6 and 20.6 respectively or about 2-3 orders of magnitude less diverse). Overall,  
155 OK and IL soils appear to be more diverse than the PR soils by about two orders of magnitude,  
156 on average, with an average Nonpareil value of  $22.75 \pm 0.37$ . Nearly complete coverage for El  
157 Verde and Pico del Este (20-30cm samples) would require  $2.402 \times 10^9$ bp and  $8.735 \times 10^9$ bp,  
158 respectively, and, for the same level of coverage, the more complex communities in Urbana (IL)  
159 would require a substantially higher sequencing effort of  $1.282 \times 10^{12}$ bp. The OK soils had an  
160 estimated sequencing depth of  $2.063 \times 10^{11} \pm 1.436 \times 10^{11}$  bp.

161  
162  
163  
164  
165  
166  
167  
168  
169  
170  
171  
172  
173  
174  
175  
176  
177  
178  
179  
180  
181  
182  
183

**Community composition variation across the forest sites based on 16S rRNA gene sequences.**

The number of total 16S-rRNA gene-based OTUs (Operational Taxonomic Unit) observed in each metagenome as well as the Chao1 estimate of total OTUs present reflected the degree of undersampling at each site (Suppl. Fig. S1 and S2), and were also consistent with the Nonpareil coverage estimates (Fig. 1). When Puerto Rico tropical soils (PR) were compared with the agricultural and grassland soils from the United States at the phylum level, *Proteobacteria*, *Acidobacteria* and *Actinobacteria* were the most abundant taxa across all ecosystems. However, in the forest soils, a few highly abundant OTUs dominated the entire soil community whereas in the OK and IL soils, OTUs were more evenly distributed (Suppl. Fig. S2), consistent with the Nonpareil diversity results. Only 1.28% of the total detected OTUs (out of a total 8019, non-singleton OTUs) were shared among all PR samples, while 49.95% of OTUs were exclusive to a particular sampling site in PR, reflecting partly the under-sampling of the extant diversity by sequencing. Only 0.37% of the OTUs (out of a total 13760, non-singleton OTUs) were shared among all the sites across all 3 ecosystems, all of which were assignable to *Alphaproteobacteria*, *Acidobacteria*, *Verrucomicrobia* and *Actinobacteria*.

Further, applying four additional DNA extraction methods on a selected subset of our samples, including two manual phenol chloroform-based methods that are often advantageous for iron rich soils like those in tropical forest, revealed similar levels of diversity, more or less (Suppl.Fig. S3). Hence, the diversity patterns reported here are robust and independent of the DNA method used.



184 **Factors driving community diversity in the forest soils: Multidimensional scaling analysis**  
185 **of beta diversity**

186 The PCoA (Principal Coordinate Analysis) plots, constructed based on the MASH  
187 distances among whole metagenomes, showed a clustering pattern that was primarily governed  
188 by site/location. Accordingly, site explained 45.22% of the total diversity (Fig. 2B). The non-  
189 metric multidimensional scaling (NMDS) analysis of the data revealed only site, pH and soil  
190 moisture to be statistically significant physicochemical parameters in explaining the observed  
191 community diversity (Fig. 2C, Suppl. Table S3). ANOSIM values also indicated site to be a  
192 more important factor than depth, with a P value of 0.001 and 0.94, respectively. Based on the  
193 distance-based redundancy analysis (dbRDA), site was the most significant factor, even when the  
194 interplay between site and sampling depth was accounted for (Suppl. Table S4). Table 1 shows  
195 the partitioning of the variance between the proportion that is explained by constrained axes (i.e.,  
196 environmental variables measured) and the porportion explained by unconstrained axes (i.e.,  
197 variance not explained by environmental variables measured). The total variance explained by all  
198 (measured) environmental variables was 80.2% (Table. 1), which is remarkably high for a soil  
199 ecosystem (61).

200

201 **Major N cycling pathways**

202 Genes encoding proteins involved in denitrification and nitrogen fixation were the most  
203 abundant nitrogen (N) cycling pathway genes detected at different sites. Overall, the forest soils  
204 harbored about a 2-3-fold higher abundance of denitrification genes, i.e., *narG*, *nirK*, and *norB*  
205 catalyzing the reduction of nitrate, nitrite, and nitric oxide, respectively, compared to the  
206 grassland and agricultural soils (Fig. 2A). For instance, the *norB* gene abundance was found to

207 be at the highest abundance among the denitrification genes, with ~37% (SD 9.5%) of the  
208 genomes in the PR soils predicted to contain a *norB* gene, compared to ~17% (SD 4%) and  
209 ~14% (SD 1.3%) at IL and OK, respectively. Similarly, *narG* showed a 3-fold higher abundance  
210 in the PR soils compared to IL and OK soils (Fig.2B). While denitrification gene abundances  
211 appeared higher in the tropical soils, the relative abundance of *nosZ* gene, i.e., 11.6% (SD 3%) of  
212 the total genomes across the four locations in the LEF were predicted to encode *nosZ*, similar to  
213 *nosZ* relative abundance in IL and OK soils, i.e., 11.75% (SD 5%) and 11.08% (SD 3%),  
214 respectively (not statistically significant at  $p=0.05$ ). Similar to *nosZ*, DNRA gene abundances  
215 (namely, *nrfA*) was similar across all sites studied herein (9%, SD 1.9%).

216

### 217 **Predominant NosZ clades are shared among soil ecosystems**

218 Placing *nosZ*-encoding reads to a reference *nosZ* phylogenetic tree revealed that atypical  
219 clades (clade II *nosZ*), affiliated predominantly with *Opitutus*, *Anaeromyxobacter* and other  
220 closely related genera, dominated the *nosZ* gene pool in the tropical forests (Figs. 3, Suppl.  
221 Figs.S4-S7). In contrast, a very small fraction of reads (<10% of total *nosZ* reads) were recruited  
222 to typical *nosZ* clades (or clade I). Members belonging to the clade II *nosZ* dominated the *nosZ*  
223 gene pool in OK and IL soils as well, with IL agricultural soils showing the greatest *nosZ*  
224 sequence diversity among the three regions. Notably, *O. terrae*-affiliated sequences represented  
225 the most abundant sub-clade (*nosZ* OTUs/sub-clades were defined at the 95% nucleotide  
226 sequence identity level) in all regions. Furthermore, most of the *O. terrae*-affiliated reads in the  
227 forest soil dataset appeared to be assigned to a single sub-clade, while their counterparts in the  
228 OK and IL soils appeared to be more evenly distributed among several closely related *nosZ* sub-  
229 clades, i.e., showing higher sequence diversity (Fig. 3, Suppl. Figs. S4-S7). *O. terrae* (strain

230 DSM 11246/PB90-1) *nosZ* reads at >95% identity made up between 20% and 60% of the total  
231 *nosZ* reads recovered from the El Verde site and, together with the second most abundant sub-  
232 clade from *Anaeromyxobacter sp.*, contributed over 30% of the total *nosZ* reads across all four  
233 PR locations (Fig. 5). Despite the significant taxonomic diversity observed in these soils (Suppl  
234 Fig. S2), the soils from PR shared several abundant *nosZ* gene sequences/sub-clades at >95  
235 nucleotide identity with soils in OK and IL (Fig. 3). Furthermore, in order to compare the  
236 predominant *nosZ* clades across the samples shown here, a new phylogenetic reference tree was  
237 constructed based on almost full length sequences obtained from the assemblies/MAGs obtained  
238 from the metagenomes studied here (namely PR,OK,IL). The short-reads identified as *nosZ* from  
239 the PR soils were placed on this tree and show that the majority of these reads are recruited by  
240 the *nosZ* sequences obtained from these assemblies/MAGs, indicating that the *nosZ* sequences  
241 across these ecosystems studies here are similar (Suppl. Fig. S8)

242

### 243 **Nitrogen fixation potential**

244 The nitrogen fixation genes (mainly *nifH*) were present at a much lower abundance in the  
245 lower altitude forest samples. For instance, only ~1-3% of all genomes in the lower altitude  
246 samples were predicted to encode *nifH* compared to a ~20% of the genomes in the higher  
247 elevation samples (Pico del Este) (Fig. 2A), and almost none of the reads from IL and OK  
248 metagenomes appeared to encode *nifH* (<0.1%). Therefore, nitrogen fixation gene abundance  
249 patterns indicated a much stronger selection for nitrogen fixation in the tropical forest relative to  
250 temperate agricultural or natural prairie soils, especially at higher elevations. Furthermore, no  
251 ammonia oxidizing genes (*amoA*) were detected in any of the soils except for Urbana soils (IL),  
252 which had a history of fertilizer (N) input.

253

254 **Recovery of metagenome-assembled genomes (MAGs) representative of each site**

255 In order to test the effect of biogeography (i.e., limits to dispersion) of taxa across the  
256 elevation gradient sampled, the distribution of abundant MAGs recovered from each PR  
257 sampling site (assembly and MAG statistics provided in Suppl. Table S6) were assessed across  
258 the sites using read-recruitment plots (62). Taxonomic assignment using the Microbial Genomes  
259 Atlas (63) revealed that the most abundant MAG at site El Verde (lowest elevation), representing  
260 4.39% of the total metagenome, and was affiliated with an unclassified *Verrucomicrobia*. The  
261 second most abundant (1.8% of total) was likely a member of the genus *Ca. Koribacter*  
262 (*Acidobacteria*) followed by an unclassified member of *Acidobacteria* (1.45% of total). The  
263 *Verrucomicrobium* MAG was found at an abundance of 1.03% of the total population at Sabana,  
264 and at 0.07% and 0.03% in Palm Nido and Pico del Este (highest elevation), respectively.  
265 Uneven coverage across the length of the reference sequence and nucleotide sequence identities  
266 were observed in the recruitment of short-reads from Palm Nido and Pico del Este as well as  
267 with all OK datasets, indicating that the related populations in the latter samples were divergent  
268 from the reference MAG (Suppl. Fig. S10). Therefore, at least this abundant low-elevation  
269 *Verrucomicrobial* population did not appear to be widespread in the other samples analyzed here  
270 (Suppl. Fig. S10). Similarly, the other abundant MAGs from other sites in the forest soils were  
271 unique to the corresponding sites (elevation) from which they were recovered. Almost all MAGs  
272 used in the analyses were assignable to a novel family, if not higher taxonomic rank, according  
273 to MiGA analysis (when compared to 11,566 classified isolate genomes available in the NCBI  
274 prokaryotic genome database), underscoring the large unexplored diversity harbored by the PR  
275 tropical rainforest soils. The sequence diversity/complexity as well as sequencing depth limited  
276 large-scale recovery of high-quality MAGS.

277

## 278 **Functional gene content of the MAGs**

279       The genome sequences of the most abundant MAGs from each location (n=6) were  
280 analyzed in more detail to assess the functions they encoded, especially with respect to N cycling  
281 pathways (Fig. 4). MAGs from Pico del Este (highest elevation) showed a high abundance of N  
282 metabolism related genes compared to MAGs from other sites (Fig. 4). Most notably, genes  
283 related to nitrogen fixation were found only in the Pico del Este MAG, which was consistent  
284 with the short read analysis datasets showing greater relative abundance of *nifH* at this site.  
285 Nitrification (ammonia oxidation related genes) gene clusters were not detected in any of the  
286 recovered MAGs. *norB* and *nosZ* genes were found in three out of the six abundant MAGs  
287 analyzed. The most abundant El Verde MAG, most closely related to *O. terrae* (AAI = 40 %),  
288 possessed a *nosZ* gene, which was congruent with the *nosZ* phylogeny described above (i.e.,  
289 ~60% of the *nosZ*-encoded reads from El Verde had a closest match to *O. terrae nosZ*  
290 sequences).

291

## 292 **DISCUSSION**

293

294       The present study reported the taxonomic and gene content diversity of the poorly  
295 characterized tropical rainforest soils by using whole-community, shotgun metagenomic  
296 sequencing of samples from the El Yunque forest, Puerto Rico. The recovered near-complete  
297 MAGs represented several abundant and widespread organisms within this ecosystem that could  
298 serve as model organisms for future studies. Furthermore, since the Luquillo Experimental Forest  
299 (LEF) within El Yunque is subjected to varying natural as well as experimental (e.g., warming,

300 phosphorus fertilization) perturbations, our study could also provide a baseline for these  
301 perturbations and future soil microbial studies at LEF. Our results revealed that the LEF soils  
302 harbor distinct microbial communities at sites with distinct elevation from sea-level. In contrast,  
303 and unlike several other soil ecosystems, sampling depth did not have a substantial impact on  
304 structuring community diversity, revealing no depth stratification in the LEF soils, at least for the  
305 depths sampled here (5-30cm). This could be due to the lack of distinct soil horizons within the  
306 first 30cm of the sampling sites, and indicates that the soil formation and/or physicochemical  
307 properties in these ecosystems could differ markedly from those in their temperate counterparts  
308 (44).

309         A recent study examining the dominant bacterial phylotypes across the globe found that  
310 the predominant phylotypes were widespread across ecosystems. The only exception to this  
311 pattern was the forest tropical soils which harbor distinct phylotypes (10). Consistent with these  
312 conclusions, the MAGs recovered from each LEF site represented at least novel species and  
313 genera, further underlining the under-tapped microbial diversity harbored by tropical forest soils.  
314 Currently, the environmental factors driving these diversity patterns remain poorly understood  
315 for tropical forest soils (10), but our study provided several new insights into this issue.

316         In particular, sites El Verde and Sabana (lowest elevation sites) had similar community  
317 structure and diversity compared to the two higher-elevation sampling sites with certain MAGs  
318 being present at both sites but not in any of the other (higher-elevation) sites examined. This is  
319 presumably attributable to both sites having similar climate and vegetation patterns (i.e.,  
320 Tabonuco forest). On the other hand, Pico del Este was the highest elevation site and experiences  
321 almost continuous cloud cover as well as horizontal precipitation. The unique topology of Pico  
322 del Este was reflected in distinct and deeply novel MAGs and gene content, which differed

323 markedly from the other three sampling sites within the LEF (PCoA plots, Fig. 2B). The high  
324 water content of the Pico del Este soils gives rise to a unique ecosystem dominated by epiphytes  
325 (e.g., moss) (64). The epiphytic community has presumably significant impacts on nutrient (e.g.,  
326 nitrogen) cycling (65), and influences the water input to the soil, thereby shaping a unique  
327 habitat/niche for the soil microbes. Free-living microbes have been shown to be one of the  
328 highest contributors to biological N fixation in these forests with high rates of nitrogenase  
329 activity associated with the presence of moss/epiphytes (53, 66). Consistent with these previous  
330 results and interpretations, the Pico del Este showed an extremely high potential for nitrogen  
331 fixation, i.e., it was estimated that 1/5 of the total bacterial genomes sampled possessed genes for  
332 N fixation, which is at least 10 times greater than any other site evaluated herein. Accordingly,  
333 we found that site (location) alone explained about half (45%) of the beta diversity differences  
334 observed among the four sampling sites, which reached ~80% when a few physicochemical  
335 parameters namely pH and moisture were also included in the analyses (Fig. 2B, Table 1). This  
336 is a remarkably high fraction of beta diversity explained by measured parameters for a soil  
337 ecosystem (61) and likely reflected that location and the physical properties that characterized  
338 different locations within LEF structured diversity much stronger than in other soil ecosystems.  
339 Tropical forests have also been shown to have significantly higher rates of nitrogen fixation  
340 compared to other ecosystems, which can exceed the N retention capacity of the soil resulting in  
341 large N loss as N<sub>2</sub>O (67). The findings reported here on denitrification gene abundances were  
342 generally consistent with these previous observations as well.

343 Links between soil community structure and nitrogen cycling can help close the  
344 knowledge gaps on how the forest ecosystems impact the release and mitigation of certain highly  
345 potent greenhouse gases such as N<sub>2</sub>O. The gene abundances observed here, e.g., more than two-

346 fold higher abundance of *norB* (associated with NO reduction to N<sub>2</sub>O) and similar *nosZ* (N<sub>2</sub>O  
347 consumption) abundances in tropical soils relative to temperate soils were consistent with higher  
348 N<sub>2</sub>O emissions observed previously from the tropics. Further, in acidic soils such as the tropical  
349 forest soils evaluated in this study, lack of N limitation can suppress complete denitrification,  
350 thereby leading to higher N<sub>2</sub>O release compared to other soil ecosystems (35). These  
351 interpretations were consistent with our observation that the PR soils harbored a relatively high  
352 abundance of respiratory (related to denitrification) *norB* genes as well. Previous studies have  
353 also suggested that most denitrifying bacterial genomes possess the genes required to reduce  
354 nitrate to nitrous oxide but do not possess the gene responsible for the last step i.e., N<sub>2</sub>O  
355 reduction to N<sub>2</sub>, leading to the release of N<sub>2</sub>O gas (Braker and Tiedje, 2003; Richardson et al.,  
356 2009; Giles et al., 2012; (22, 26-29), consistent with the findings of our study.

357         It has been established that tropical forest soils are the single highest contributor of  
358 natural N<sub>2</sub>O emissions. While several abiotic and microbial processes can contribute to soil N<sub>2</sub>O,  
359 N<sub>2</sub>O consumption is an exclusively microbial process, catalyzed by the enzyme product of the  
360 *nosZ* genes (34). Based on the assessment of the *nosZ* gene phylogeny, it appears that almost all  
361 of the *nosZ* genes from the tropical forest soils studied here belong to a previously overlooked  
362 Clade II or atypical *nosZ* genes (32, 34, 68). This clade consists mainly of non-denitrifying, and  
363 secondary denitrifying N<sub>2</sub>O reducers. Despite the unique phylogenetic diversity harbored by  
364 tropical soils in general, the *nosZ* gene sequence diversity appears to be shared between  
365 temperate and agricultural soils (Fig 4). These findings imply strong selection pressure for  
366 conservation of nitrous oxide reductase sequences across tropical and temperate soil ecosystems  
367 that are not apparently applicable to other N-cycling genes and pathways, which warrants further  
368 attention in the future.



369           Integration of functional (e.g., gene expression) data with *in-situ* rate measurements will  
370 provide a more complete picture of the composition and functioning in tropical forest soils. The  
371 identification of certain biomarker genes such as *nosZ* sequences in our study could facilitate  
372 future investigations on biogeochemical N-cycling and greenhouse gas emissions. For instance,  
373 the assembled MAGs and gene sequences provided here could be useful for the design of  
374 specific PCR assays for assessing transcript levels (activity), allowing potential linking of carbon  
375 dioxide, methane, nitrogen, SOM, etc. turnover to the activity of individual populations. It would  
376 also be interesting to assess how the findings reported here for the LEF apply (or not) to other  
377 tropical forests especially because our study is based on a relative small sample size. While the  
378 diversity in the Puerto Rico soils appears to be lower than that in temperate grassland and  
379 agricultural soils, and different DNA extraction methods, including phenol-chloroform- and kit-  
380 based, provided for similar results (Fig. S3), it is important to note that DNA of the temperate  
381 soil samples was extracted using different methods (OK soils were extracted using the PowerSoil  
382 kit). Therefore, it would be important to confirm these preliminary findings by using the exact  
383 same DNA extraction and sequencing procedures in all soils. Despite the sample size, however,  
384 our results showed differences along the elevation gradient sampled at the LEF that are  
385 independent of DNA extraction (Suppl.Fig. S3) or sequencing methods, and consistent with our  
386 metadata (Fig. 2), and previous process rate measurements. As the gradients at the LEF also  
387 provide a natural setting to interpret the potential ramifications of climate change scenarios such  
388 as altered participation patterns, the DNA sequences provided here could facilitate future  
389 manipulation experiments with an emphasis on understanding and predicting the effects of  
390 climate change on microbial community dynamics along the elevation gradient.  
391

## 392 MATERIALS AND METHODS

393

### 394 Sampling sites

395 Soil samples were collected on February 2016 from four locations/sites across the LEF (18.3' N,  
396 65.80' W). The four sites namely, Sabana, El Verde field station, Palm Nido and Pico del Este,  
397 each located at different elevations from the mean sea level, i.e., 265, 434, 634 and 953 m,  
398 respectively, were chosen due to their unique landscape and rainfall patterns, thereby creating  
399 distinct ecological niches (Fig. 2A).

400 The El Yunque forest is categorized into four distinct vegetation zones namely, the  
401 Tabonuco, Palo Colorado, Sierra Palm and Dwarf/Elfin forests. Site Sabana and El Verde, which  
402 are located at the lowest elevation among the four sites within the LEF, fall under the Tabonuco  
403 forest category in terms of vegetation, dominated by the tree species *Dacryodes excelsa* (native  
404 to Puerto Rico). They are characterized by canopy cover and low light intensities at the ground  
405 level which account for the sparsely vegetated forest floor. However, these sites still harbor the  
406 richest flora of all sites (69). Palm Nido is characterized by unstable, wetter soils, steeper slopes  
407 and the vegetation is dominated by the Sierra Palm (*Prestoea montana*). The site at the highest  
408 elevation, Pico del Este (dwarf forest ecosystem or “elfin woodlands”) is characterized by higher  
409 winds, lower temperatures and the vegetation is enveloped by clouds (41, 70) and its main  
410 vegetation is comprised of moss and epiphytes. Furthermore, highly acidic soil and continuously  
411 water-saturated soils deficient in oxygen are some major characteristics of this ecosystem with  
412 most mineral inputs for plants become dissolved in the rain and fog.

413 Three adjacent soil profiles were taken from each of the four LEF sites (4 sites  
414 encompassing 3 lifezones, Palo Colorado was not sampled). For each profile, individual soil

415 cores were taken at each depth (0-5cm, 5-20cm, 20-30cm) using a 3-cm diameter x 15-cm length  
416 soil corer (AMS Inc, Idaho) that was decontaminated between samplings by washing with 70%  
417 ethanol. Soil samples were stored in sterile Whirl-pak bags and kept on ice during transport and  
418 until storage at -80° C. The three cores at each sampling depth were pooled together for  
419 community DNA extraction, producing a total of twelve samples across the four sites.

420 Soil pH was determined using an automated LabFit AS-3000 pH Analyzer, and soil  
421 extractable P, K, Ca, Mg, Mn, and Zn were extracted using the Mehlich-1 method and measured  
422 using an inductively coupled plasma spectrograph at the University of Georgia Agricultural and  
423 Environmental Services Laboratories (Athens, GA, USA). Soil extractable P using this method is  
424 interpreted as the bioavailable fraction of P. NH<sub>4</sub>-N and NO<sub>3</sub>-N were measured by first  
425 extracting them from soil samples with 0.1 N KCl, followed by the colorimetric phenate method  
426 for NH<sub>4</sub><sup>+</sup> and the cadmium reduction method NO<sub>3</sub>. The physicochemical conditions at the sites  
427 during the time of sampling are provided in Supplementary Table (S1).

428

#### 429 **Community DNA extraction and sequencing**

430 Total DNA from soil was extracted using the FastDNA SPIN KIT (MP Biomedicals, Solon, OH)  
431 following manufacturer's procedure with the following modifications (71). Soils were air dried  
432 under aseptic conditions followed by grinding employing a mortar and pestle. Cells were lysed  
433 by bead beating and DNA was eluted in 50 µl of sterile H<sub>2</sub>O. DNA sequencing libraries were  
434 prepared using the Illumina Nextera XT DNA library prep kit according to manufacturer's  
435 instructions except the protocol was terminated after isolation of cleaned double stranded  
436 libraries. Library concentrations were determined by fluorescent quantification using a Qubit HS  
437 DNA kit and Qubit 2.0 fluorometer (ThermoFisher Scientific), and samples were run on a High

438 Sensitivity DNA chip using the Bioanalyzer 2100 instrument (Agilent) to determine library insert  
439 sizes. An equimolar pool of the sequencing libraries was sequenced on an Illumina HiSeq 2500  
440 instrument (located in the School of Biological Sciences, Georgia Institute of Technology) using  
441 the HiSeq Rapid PE Cluster Kit v2 and HiSeq Rapid SBS Kit v2 (Illumina) for 300 cycles (2 x  
442 150 bp paired end). Adapter trimming and demultiplexing of sequenced samples was carried out  
443 by the HiSeq instrument. In total, 12 metagenomic datasets were generated (3 per site for the  
444 three depths), and statistic details on each dataset are provided in Supplementary Table S2.

445 In order to test for any DNA extraction biases of the kit used above, especially for the  
446 high iron/clay content that characterizes tropical forest soils and is known to affect the extraction  
447 step, four additional DNA extraction methods were performed in parallel on a small subset of  
448 samples collected in 2018 from the same sites (6 samples per extraction method for 5 extraction  
449 methods covering the 4 sites). The methods included two manual (as opposed to kit-based)  
450 phenol-chloroform based methods (72, 73) as well as two other kit-based methods namely;  
451 DNeasy PowerSoil and DNeasy PowerSoil Pro (Qiagen Inc.). For this evaluation, the soils were  
452 first homogenized and subsequently in five subsamples to use with each method (including the  
453 FastDNA SPIN KIT-based method mentioned above). The libraries were constructed and  
454 sequenced the same way as described above for the FastDNA SPIN KIT method.

455 All metagenomic datasets were deposited in the European Nucleotide Archive (ENA) under  
456 project PRJEB26500. Additional data is available at <http://enve-omics.ce.gatech.edu/data/prsoils>.

457

#### 458 **Bioinformatics analysis of metagenomic reads and MAGs**

459 The paired end reads were trimmed and quality checked using the SolexaQA (74) package with a  
460 cutoff of  $Q > 20$  ( $\geq 99\%$  accuracy per base-position) and a minimum trimmed length of 50 bp.

461 *i) Assembly and population genome binning*: Co-assembly of the short reads from the same  
462 location was performed using IDBA-UD (75) and only resulting contigs longer than 500 bp in  
463 length were used for downstream analysis (e.g. functional annotation and MyTaxa  
464 classification). Genes were predicted on the co-assembled contigs using MetaGeneMark (76) and  
465 the predicted protein-coding regions were searched against the NCBI All Genome database using  
466 Blastp (77). Since the assembly of individual datasets resulted mostly in short contigs (data not  
467 shown), the contigs from the co-assembly (combining metagenomes from the three sampling  
468 depths, for each site) were used for population genome binning. Contigs longer than 1Kbp were  
469 binned using MaxBin (78) to recover individual MAGs (default settings). The resulting bins  
470 were quality checked for contamination and completeness using CheckM (79), and were further  
471 evaluated for their intra-population diversity and sequence discreteness using fragment  
472 recruitment analysis scripts as part of the Enveomics collection (62) essentially as previously  
473 described (80).

474 *ii) Functional annotation of MAGs*: Genes were predicted for each MAG using MetaGeneMark  
475 and the predicted protein-coding regions were searched against the curated Swiss-Prot (81)  
476 protein database using Blastp (77). Matches with a bitscore higher than 60 or amino acid identity  
477 higher than 40% were used in subsequent analysis. The Swiss-Prot database identifiers were  
478 mapped to their corresponding metabolic function based on the hierarchical classification  
479 subsystems of the SEED subsystem category (Level 1) (82). The relative abundance of genes  
480 mapping to each function was calculated based on the number of predicted genes from each  
481 MAG assigned to the function (for read-based assessment, see below). Relative abundance data  
482 were plotted in R using the “superheat” package (<https://arxiv.org/abs/1512.01524>). Individual  
483 biomarker genes for each step of the nitrogen cycling pathway were manually verified by

484 visually checking the alignment of the identified sequences by the pipeline outlined above  
485 against verified reference sequences.

486 *iii) Functional annotation of short reads*: Protein-coding sequences present in short reads were  
487 predicted using FragGeneScan (83) using the 1% Illumina error model. The predicted genes were  
488 then searched against the Swiss-Prot database using Blastp (best match). Low quality matches  
489 (bitscore < 60) were excluded, and relative abundance of genes mapping to each function was  
490 determined as described in the previous section.

491

### 492 **Community diversity estimation**

493 *i) Nonpareil*: Nonpareil (60) was used to estimate sequence coverage, i.e., what fraction of the  
494 total extracted community DNA was sequenced and predict the sequencing effort required to  
495 achieve "nearly complete coverage" ( $\geq 95\%$ ). The default parameters in Nonpareil were used for  
496 all datasets. Only one of the two paired reads (forward) for each dataset was used to avoid  
497 dependency of the paired reads, which can bias Nonpareil estimates (60).

498 *ii) MASH and multidimensional scaling*: MASH, a tool employing the MinHash dimensionality  
499 reduction technique to compare sample-to-sample sequence composition based on k-mers (84),  
500 was used to compute pairwise distances between whole metagenomic datasets and construct the  
501 distance matrix to be used in multidimensional scaling. Pairwise MASH distances between the  
502 metagenomic datasets were computed from the size-reduced sketches (default parameters).

503 PCoA (Principal coordinate analysis) and NMDS (Non-metric multidimensional scaling) were  
504 employed to visualize the distance matrix and evaluate the physicochemical parameters driving  
505 community diversity, respectively. Furthermore, dbRDA (distance based redundancy analysis),

506 was used to obtain a finer resolution on the observed compositional variation. All of the above  
507 statistical analysis were performed using the vegan package in R (85), with default settings.  
508 *iii) 16S rRNA gene fragments recovered from shotgun metagenomes:* 16S ribosomal rRNA (16S)  
509 gene fragments were extracted from the metagenomic datasets using Parallel-META (86). 16S-  
510 carrying reads were classified taxonomically using the GreenGenes database.  
511 Recovered 16S fragments were clustered ('closed-reference OTU picking' strategy using  
512 UCLUST (87)) and taxonomically classified based on their best match in the GreenGenes  
513 database (88) at an ID  $\geq$  97% in QIIME (89, 90). The relative abundance of the OTUs were  
514 calculated based on the number of reads assigned to each OTU. Community composition was  
515 assessed based on OTU taxonomic assignments at the genus and the phylum ranks and was  
516 compared between the sites based on the relative abundance of OTUs at each site.

517

### 518 **Identification of N cycling genes using ROcker**

519 ROcker (91) was employed for a precise identification and quantification of *nosZ* (encoding  
520 nitrous oxide reductase), *norB* (encoding respiratory nitric oxide reductase, cytochrome bc  
521 complex associated), *nirK* (encoding nitrite reductase), *narG* (encoding nitrate reductase), *nrfA*  
522 (encoding nitrite reductase, DNRA related) *amoA* (encoding ammonia monooxygenase) and *nifH*  
523 (encoding nitrogenase) encoding metagenomic reads ([http://enve-](http://enve-omics.ce.gatech.edu/rocker/models)  
524 [omics.ce.gatech.edu/rocker/models](http://enve-omics.ce.gatech.edu/rocker/models)). Briefly, the short-read nucleotide sequences were searched  
525 (using Blastx) against a training set for each abovementioned protein; training sets were  
526 manually curated to encompass experimentally verified reference sequences as suggested  
527 previously (91). The resulting matching sequences were then filtered using the ROcker compiled  
528 model (model for 150bp-long reads for PR and OK soils and 100 bp model for IL soils). Protein

529 abundances (based on the number of reads assigned to the protein) were normalized by  
530 calculating genome equivalents. For the latter, the ROcker-filtered read counts were normalized  
531 by the median length of the sequences of each protein reference, and the corresponding genome  
532 equivalents were calculated as the ratio of NosZ (or another protein of interest) read counts to the  
533 RNA polymerase subunit B (*rpoB*), a universal single copy marker, read counts.

534

### 535 *NosZ phylogenetic analysis*

536 The NosZ reference protein sequences were aligned were aligned using CLUSTAL Omega (92)  
537 and a maximum likelihood reference tree was created using RAxML v 8.0.19 (93) with a general  
538 time reversible model option, gamma parameter optimization and '-f a' algorithm. The ROcker  
539 identified NosZ-encoding reads were extracted from all datasets, translated into protein  
540 sequences using FragGeneScan, and then added to the reference alignment using Mafft (94). The  
541 reads were placed in the phylogenetic tree using RAxML EPA algorithm and visualized using  
542 iTOL (95).

543

### 544 **Intra-population diversity assessment based on recovered MAGs**

545 The taxonomic affiliation of individual contig sequences of a MAG was evaluated based on  
546 MyTaxa, a homology based classification tool (96). The MiGA (Microbial Genomes Atlas,  
547 [www.microbial-genomes.org](http://www.microbial-genomes.org)) webserver was used for the taxonomic classification of the whole  
548 MAG using the ANI/AAI concept. To assess intra-population diversity and sequence  
549 discreteness, each target population MAG was searched against all the reads from each location  
550 by Blastn (only contigs longer than 2Kbp were used). Fragment recruitment plots were  
551 constructed based on the Blastn matches (threshold values: nucleotide identity  $\geq 75\%$  and



552 alignment length  $\geq 80$ bp) using the Enveomics collection of scripts (62). The evenness of  
553 coverage and sequence diversity of the reads across the length of the reference genome sequence  
554 were used to evaluate the presence and discreteness of the population in the chosen dataset.

555

556

557 **Acknowledgments.** This work was supported by the U.S. Department of Energy, Office of  
558 Biological and Environmental Research, Genomic Science Program (award DE-SC0006662) and  
559 US National Science Foundation (award 1831582). GG was supported by the Luquillo Critical  
560 Zone Observatory (National Science Foundation grant EAR-1331841) and the Luquillo Long-  
561 Term Ecological Research Site (National Science Foundation grant DEB-1239764). All research  
562 at the USDA Forest Service International Institute of Tropical Forestry is done in collaboration  
563 with the University of Puerto Rico. We thank María Rivera and Humberto Robles from IITF for  
564 their help in soil sampling.

565

566

567 **TABLES:**

568 **Table 1: Proportion of total microbial community diversity explained by measured soil**  
569 **environmental factors.**

|               | Inertia | Proportion | Rank |
|---------------|---------|------------|------|
| Total         | 0.1092  | 1          |      |
| Constrained   | 0.0876  | 0.8021     | 6    |
| Unconstrained | 0.02161 | 0.1978     | 5    |

Site, sampling depth, pH, total nitrogen, total carbon, moisture data were considered in the analysis

570

571 **FIGURE LEGENDS**

572

573 **Fig. 1: Sampling location map and microbial community diversity among the study sites. A.**

574 Map of the four sampling sites within the Luquillo Experimental Forest (LEF). B. Principal co-

575 ordinate analysis (PCoA) plots based on MASH distances, colored by sampling site, C.

576 Nonmetric multidimensional scaling (NMDS) plot with the soil physicochemical parameters

577 incorporated. The arrow lengths are proportional to the strength of the correlations obtained

578 between measured soil physicochemical parameters and each ordination axis.

579

580 **Fig. 2: Abundance of N cycling genes and their distribution across soil ecosystems. A.**

581 Abundance of hallmark genes for denitrification, DNRA and nitrogen fixation pathways,

582 represented as genome equivalents (% of total bacterial genomes sampled that carry the gene) in

583 the metagenomes studied (see Figure key). B. Frequency of genomes carrying the respective

584 denitrifying gene across the three ecosystems studied. Genes denoted by the same letter are not  
585 statistically significantly different between ecosystems (ANOVA Tukey test). Statistical  
586 significance reported at  $p < 0.05$ . Note that nitrification genes were not detected in any of the  
587 Puerto Rico sites.

588

589 **Fig. 3: Phylogenetic diversity of *nosZ*-encoding sequences recovered in each soil ecosystem.**

590 *nosZ* sequences were identified by the ROCKER pipeline and placed in a reference *nosZ*  
591 phylogeny as described in the Materials and Methods section. The radii of the pie charts are  
592 proportional to the number of reads assigned to each sub-clade and the colors represent the  
593 sampling sites from each ecosystem (see Figure key). Sub-clades highlighted in grey indicate the  
594 most abundant sub-clades across all three ecosystems whereas the ones highlighted in blue were  
595 abundant only in agricultural soils (IL). A. *nosZ* reads from every sampling site recruiting to  
596 atypical (Clade II) clades. B. *nosZ* reads recruiting to typical (Clade I) clades. Inset shows the  
597 most abundant sub-clade (*Opitutus terrae*) from panel A and its distribution across all sites. Note  
598 that in all three ecosystems most of the reads recruit to atypical sub-clades. Suppl. Fig. S7 shows  
599 the distribution of the reads among the most abundant sub-clades in detail.

600

601 **Fig. 4: Functions encoded by the recovered population MAGs.** Heatmap showing the relative

602 abundance of genes encoding the major metabolic functions (Level 1 of the SEED subsystem

603 category) for each MAG recovered from the four sites in Puerto Rico. The taxonomic

604 classification of each MAG based on MiGA is shown on the bottom left. The symbols at the

605 bottom of the heatmap denote the presence (or absence) of specific N-cycling genes, namely

606 denitrification and nitrogen fixation. No genes involved in nitrification were detected in any of  
607 the bins.

608 **FIGURES**  
609

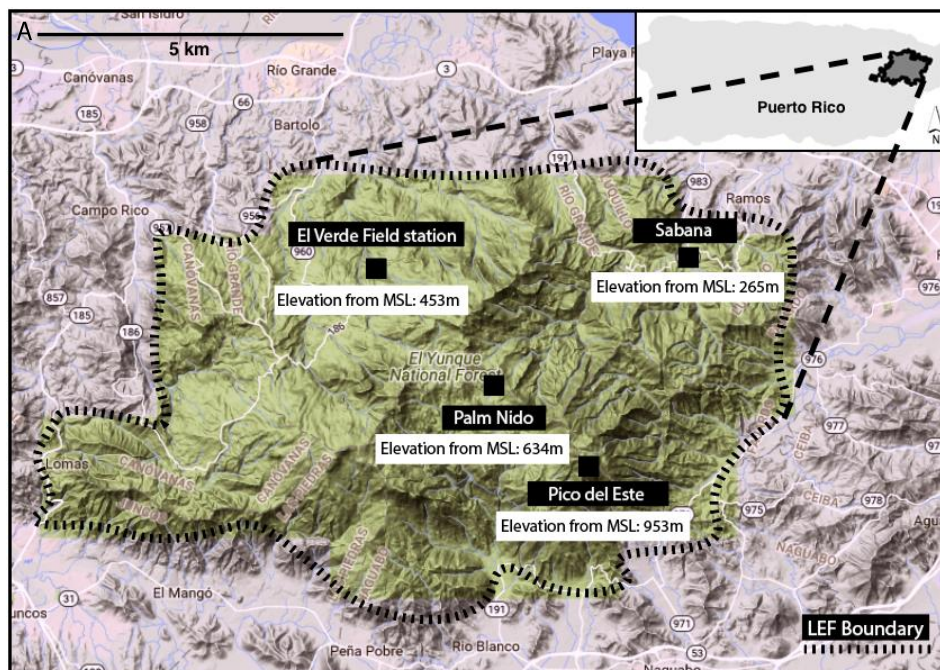

610

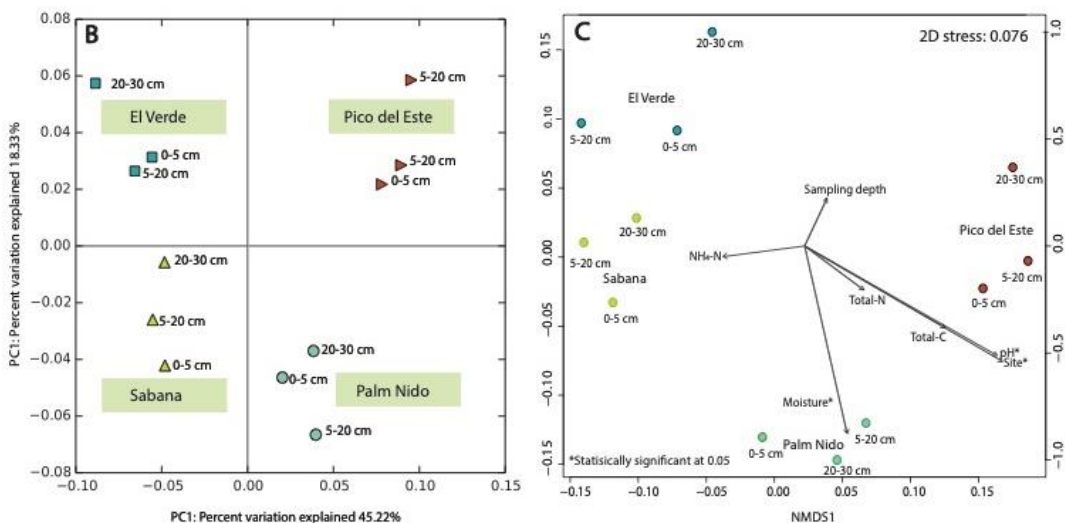

611  
612  
613  
614  
615

**Figure 1: Sampling location map and microbial community diversity among the study sites.**

616  
617  
618  
619

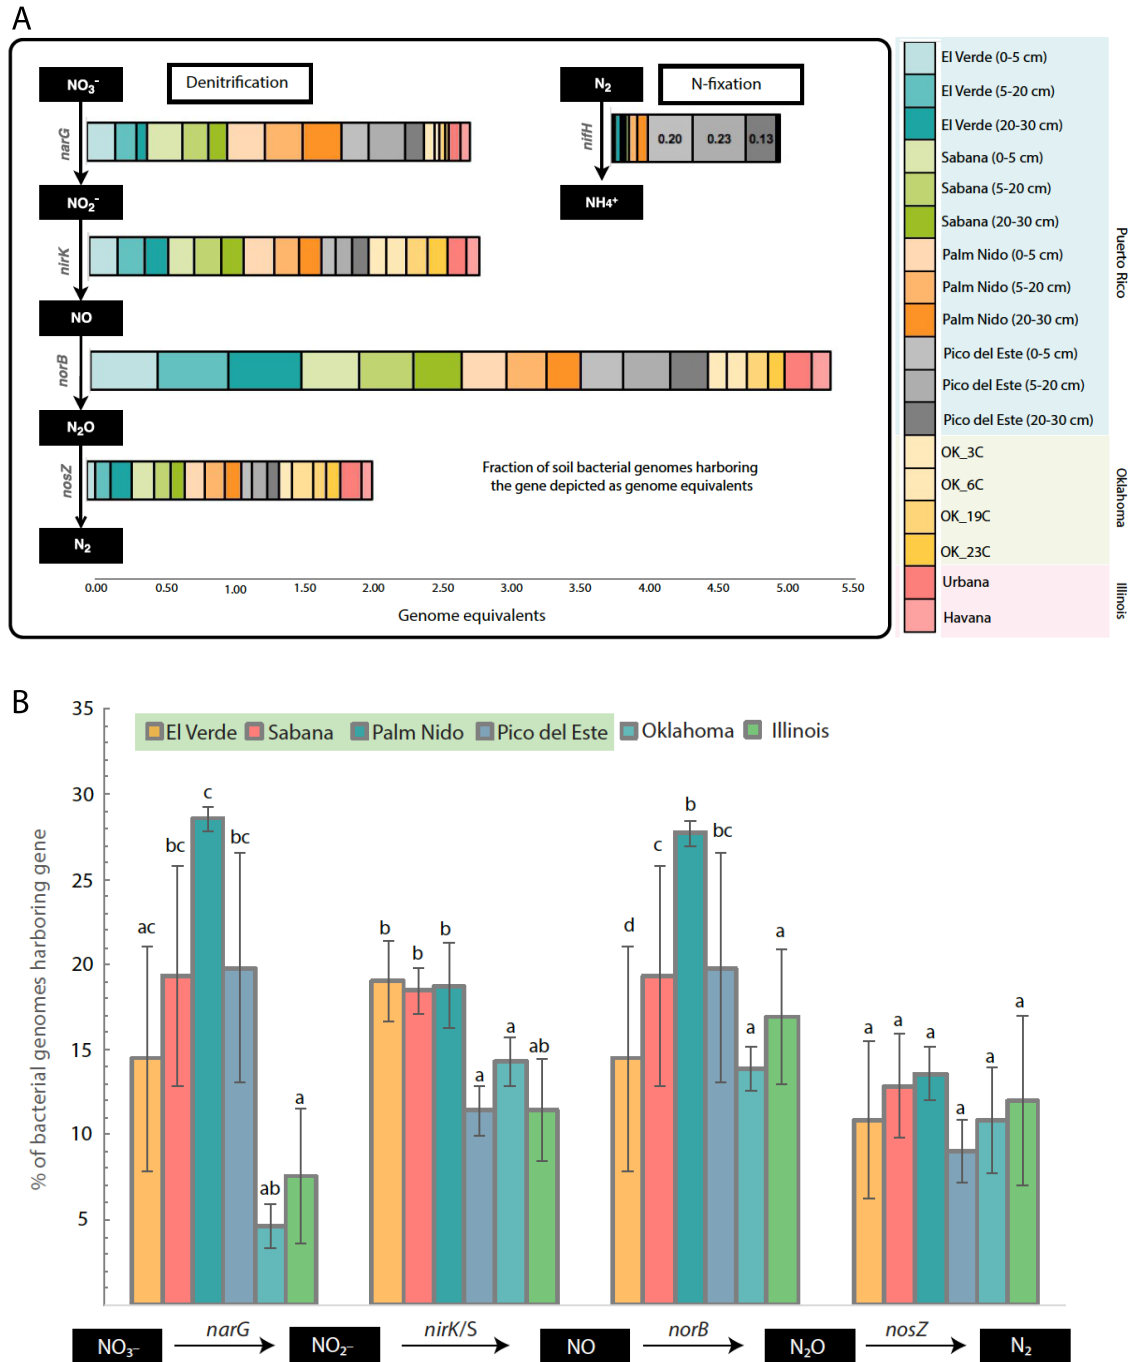

620  
621  
622  
623  
624

**Figure 2: Abundance of N cycling genes and their distribution across soil ecosystems.**

625

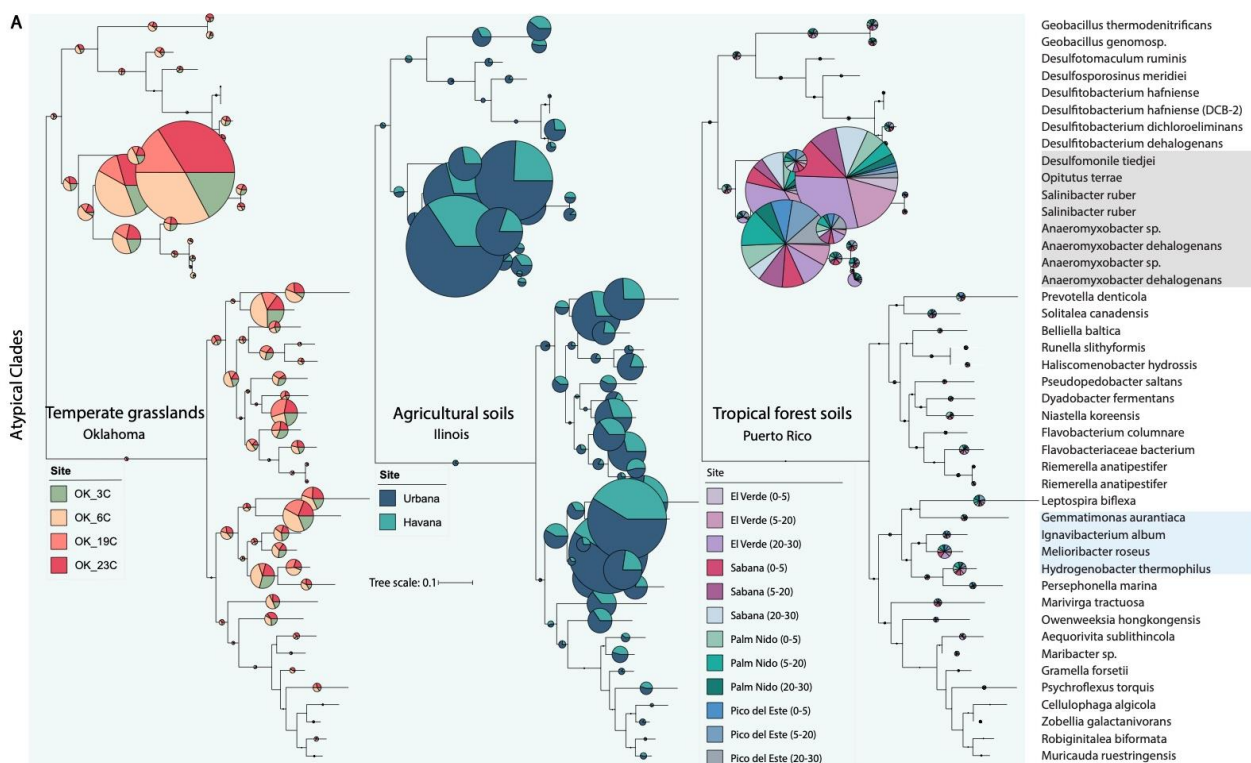

626

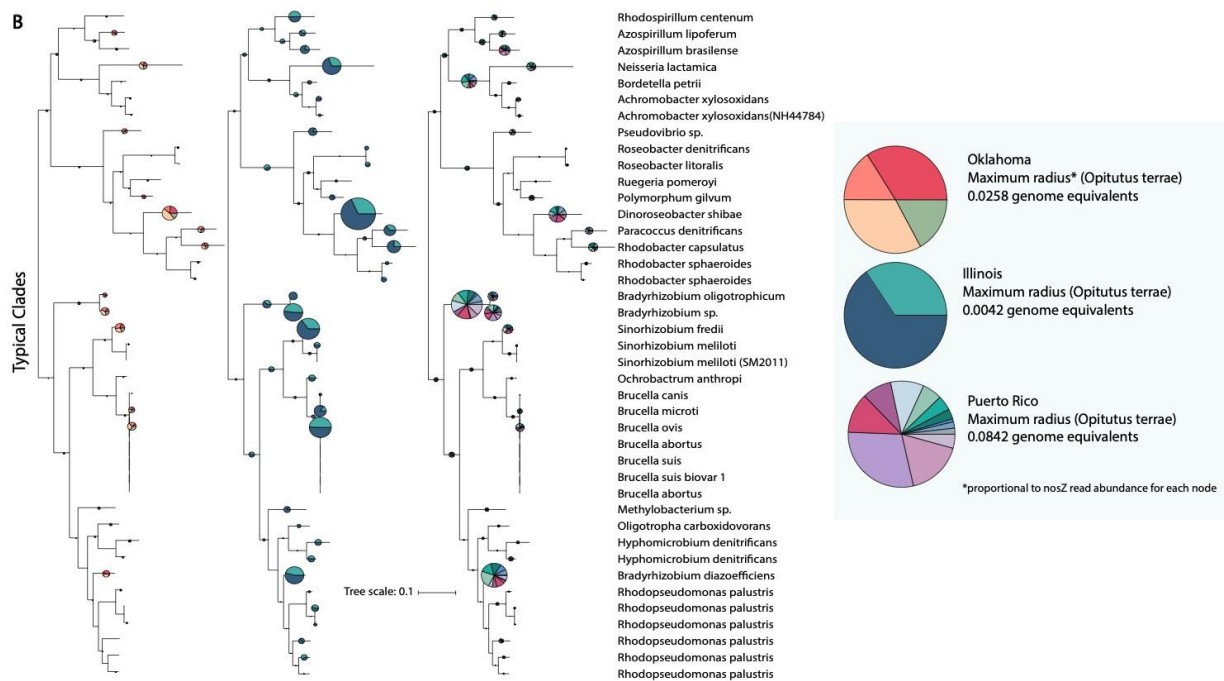

627

628

629

630

**Figure 3: Phylogenetic diversity of *nosZ*-encoding sequences recovered in each soil ecosystem.**



631

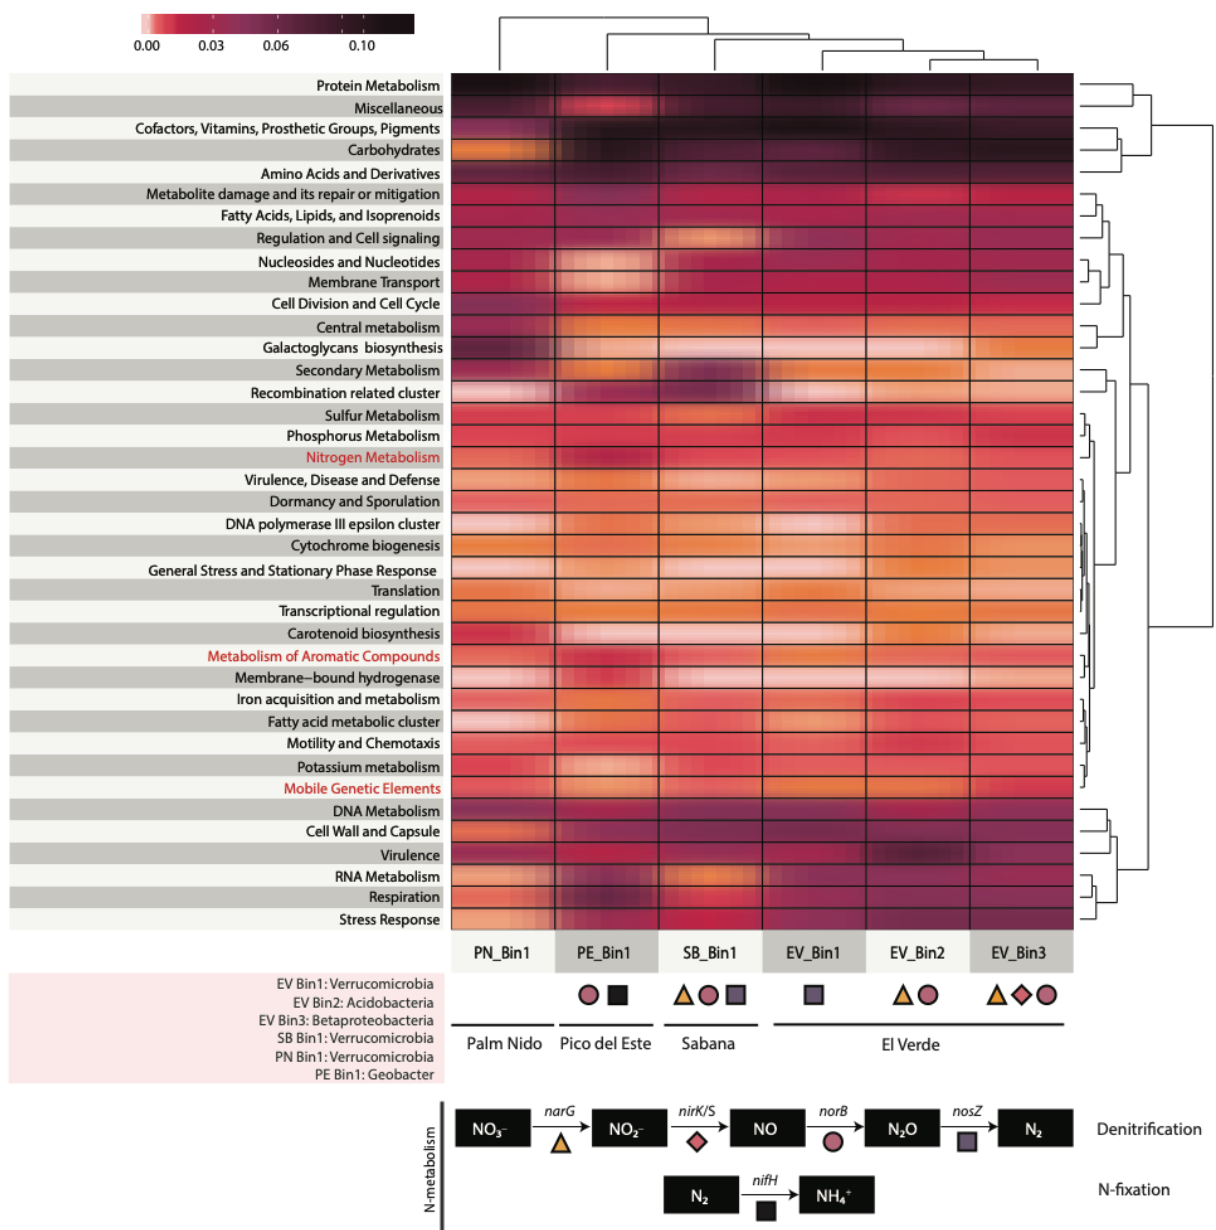

632

633

**Figure 4: Functions encoded by the recovered population MAGs.**

634 **REFERENCES**

- 635  
636
- 637 1. Luo C, Rodriguez-R LM, Johnston ER, Wu L, Cheng L, Xue K, Tu Q, Deng Y, He Z,  
638 Shi JZ, Yuan MM, Sherry RA, Li D, Luo Y, Schuur EAG, Chain P, Tiedje JM, Zhou J,  
639 Konstantinidis KT. 2014. Soil Microbial Community Responses to a Decade of Warming  
640 as Revealed by Comparative Metagenomics. *Applied and Environmental Microbiology*  
641 80:1777-1786.
- 642 2. Fierer N, Bradford Mark A, Jackson Robert B. 2007. Toward an ecological classification  
643 of soil bacteria *Ecology* 88:1354-1364.
- 644 3. Van Der Heijden Marcel GA, Bardgett Richard D, Van Straalen Nico M. 2007. The  
645 unseen majority: soil microbes as drivers of plant diversity and productivity in terrestrial  
646 ecosystems. *Ecology Letters* 11:296-310.
- 647 4. Battin TJ, Sloan WT, Kjelleberg S, Daims H, Head IM, Curtis TP, Eberl L. 2007.  
648 Microbial landscapes: new paths to biofilm research. *Nat Rev Micro* 5:76-81.
- 649 5. Fierer N. 2017. Embracing the unknown: disentangling the complexities of the soil  
650 microbiome. *Nat Rev Micro* 15:579-590.
- 651 6. Fierer N, Jackson RB. 2006. The diversity and biogeography of soil bacterial  
652 communities. *Proc Natl Acad Sci U S A* 103:626-631.
- 653 7. DeAngelis KM, Chivian D, Fortney JL, Arkin AP, Simmons B, Hazen TC, Silver WL.  
654 2013. Changes in microbial dynamics during long-term decomposition in tropical forests.  
655 *Soil Biology and Biochemistry* 66:60-68.
- 656 8. Malhi Y, Phillips OL. 2004. Tropical forests and global atmospheric change: a synthesis.  
657 *Philosophical Transactions of the Royal Society of London Series B: Biological Sciences*  
658 359:549.
- 659 9. Nemergut DR, Costello EK, Hamady M, Lozupone C, Jiang L, Schmidt SK, Fierer N,  
660 Townsend AR, Cleveland CC, Stanish L, Knight R. 2011. Global patterns in the  
661 biogeography of bacterial taxa. *Environmental Microbiology* 13:135-144.
- 662 10. Delgado-Baquerizo M, Oliverio AM, Brewer TE, Benavent-González A, Eldridge DJ,  
663 Bardgett RD, Maestre FT, Singh BK, Fierer N. 2018. A global atlas of the dominant  
664 bacteria found in soil. *Science* 359:320.
- 665 11. Pajares S, Bohannan BJM. 2016. Ecology of Nitrogen Fixing, Nitrifying, and  
666 Denitrifying Microorganisms in Tropical Forest Soils. *Front Microbiol* 7:1045.
- 667 12. Chambers JQ, Silver WL. 2004. Some aspects of ecophysiological and biogeochemical  
668 responses of tropical forests to atmospheric change. *Philos Trans R Soc Lond B Biol Sci*  
669 359:463-76.



- 670 13. Templer PH, Silver WL, Pett-Ridge J, M. DeAngelis K, Firestone MK. 2008. PLANT  
671 AND MICROBIAL CONTROLS ON NITROGEN RETENTION AND LOSS IN A  
672 HUMID TROPICAL FOREST. *Ecology* 89:3030-3040.
- 673 14. Cusack DF, Silver WL, Torn MS, Burton SD, Firestone MK. 2011. Changes in microbial  
674 community characteristics and soil organic matter with nitrogen additions in two tropical  
675 forests. *Ecology* 92:621-632.
- 676 15. K. Firestone M, Davidson E. 1989. Microbiological Basis of NO and N<sub>2</sub>O Production  
677 and Consumption in Soil, vol 47.
- 678 16. Frasier R, Ullah S, Moore TR. 2010. Nitrous Oxide Consumption Potentials of Well-  
679 drained Forest Soils in Southern Québec, Canada. *Geomicrobiol J* 27:53-60.
- 680 17. Schmidt J, Seiler W, Conrad R. 1988. Emission of nitrous oxide from temperate forest  
681 soils into the atmosphere. *J Atmos Chem* 6:95-115.
- 682 18. Díaz-Pinés E, Werner C, Butterbach-Bahl K. 2018. Effects of Climate Change on CH<sub>4</sub>  
683 and N<sub>2</sub>O Fluxes from Temperate and Boreal Forest Soils, p 11-27. *In* Perera AH,  
684 Peterson U, Pastur GM, Iverson LR (ed), *Ecosystem Services from Forest Landscapes:*  
685 *Broadscale Considerations* doi:10.1007/978-3-319-74515-2\_2. Springer International  
686 Publishing, Cham.
- 687 19. Butterbach-Bahl K, Baggs EM, Dannenmann M, Kiese R, Zechmeister-Boltenstern S.  
688 2013. Nitrous oxide emissions from soils: how well do we understand the processes and  
689 their controls? *Philos Trans R Soc Lond B Biol Sci* 368.
- 690 20. Houlton BZ, Wang Y-P, Vitousek PM, Field CB. 2008. A unifying framework for  
691 dinitrogen fixation in the terrestrial biosphere. *Nature* 454:327.
- 692 21. Werner C, Butterbach-Bahl K, Haas E, Hickler T, Kiese R. 2007. A global inventory of  
693 N<sub>2</sub>O emissions from tropical rainforest soils using a detailed biogeochemical model.  
694 *Global Biogeochemical Cycles* 21:GB3010.
- 695 22. Giles M, Morley N, Baggs EM, Daniell TJ. 2012. Soil nitrate reducing processes –  
696 drivers, mechanisms for spatial variation, and significance for nitrous oxide production.  
697 *Front Microbiol* 3:407.
- 698 23. Onley JR, Ahsan S, Sanford RA, Löffler FE. 2018. Denitrification by *Anaeromyxobacter*  
699 *dehalogenans*, a Common Soil Bacterium Lacking the Nitrite Reductase Genes *nirS* and  
700 *nirK*. *Applied and Environmental Microbiology* 84.
- 701 24. Braker G, Tiedje JM. 2003. Nitric Oxide Reductase (*norB*) Genes from Pure Cultures and  
702 Environmental Samples. *Appl Environ Microbiol* 69:3476-3483.
- 703 25. Richardson D, Felgate H, Watmough N, Thomson A, Baggs E. 2009. Mitigating release  
704 of the potent greenhouse gas N<sub>2</sub>O from the nitrogen cycle – could enzymic regulation  
705 hold the key? *Trends Biotechnol* 27:388-397.

- 706 26. Spiro S. 2012. Nitrous oxide production and consumption: regulation of gene expression  
707 by gas-sensitive transcription factors. *Philos Trans R Soc Lond B Biol Sci* 367:1213-  
708 1225.
- 709 27. Black A, Hsu PCL, Hamonts KE, Clough TJ, Condrón LM. 2016. Influence of copper on  
710 expression of nirS, norB and nosZ and the transcription and activity of NIR, NOR and  
711 N(2). *Microb Biotechnol* 9:381-388.
- 712 28. Garbeva P, Baggs EM, Prosser JI. 2007. Phylogeny of nitrite reductase (nirK) and nitric  
713 oxide reductase (norB) genes from *Nitrosospora* species isolated from soil. *FEMS*  
714 *Microbiol Lett* 266:83-9.
- 715 29. Zumft WG. 2005. Nitric oxide reductases of prokaryotes with emphasis on the  
716 respiratory, heme-copper oxidase type. *J Inorg Biochem* 99:194-215.
- 717 30. Higgins SA, Schadt CW, Matheny PB, Löffler FE. 2018. Phylogenomics Reveal the  
718 Dynamic Evolution of Fungal Nitric Oxide Reductases and Their Relationship to  
719 Secondary Metabolism. *Genome Biology and Evolution* 10:2474-2489.
- 720 31. Braker G, Conrad R. 2011. Diversity, structure, and size of N(2)O-producing microbial  
721 communities in soils--what matters for their functioning? *Adv Appl Microbiol* 75:33-70.
- 722 32. Hallin S, Philippot L, Löffler FE, Sanford RA, Jones CM. Genomics and Ecology of  
723 Novel N<sub>2</sub>O-Reducing Microorganisms. *Trends in Microbiology* 26:43-55.
- 724 33. Richardson D, Felgate H, Watmough N, Thomson A, Baggs E. Mitigating release of the  
725 potent greenhouse gas N<sub>2</sub>O from the nitrogen cycle &#x2013; could  
726 enzymic regulation hold the key? *Trends in Biotechnology* 27:388-397.
- 727 34. Hallin S, Philippot L, Löffler FE, Sanford RA, Jones CM. 2018. Genomics and Ecology  
728 of Novel N<sub>2</sub>O-Reducing Microorganisms. *Trends Microbiol* 26:43-55.
- 729 35. Zhang J, Cai Z, Cheng Y, Zhu T. 2009. Denitrification and total nitrogen gas production  
730 from forest soils of Eastern China. *Soil Biol Biochem* 41:2551-2557.
- 731 36. Orr CH, James A, Leifert C, Cooper JM, Cummings SP. 2011. Diversity and Activity of  
732 Free-Living Nitrogen-Fixing Bacteria and Total Bacteria in Organic and Conventionally  
733 Managed Soils. *Applied and Environmental Microbiology* 77:911-919.
- 734 37. Townsend Alan R, Cleveland Cory C, Houlton Benjamin Z, Alden Caroline B, White  
735 James WC. 2011. Multi-element regulation of the tropical forest carbon cycle. *Frontiers*  
736 *in Ecology and the Environment* 9:9-17.
- 737 38. Hedin LO, Brookshire ENJ, Menge DNL, Barron AR. 2005. The Nitrogen Paradox in  
738 Tropical Forest Ecosystems. *Annu Rev Ecol Evol Syst* 40:613-635.
- 739 39. Brookshire EN, Gerber S, Menge DN, Hedin LO. 2012. Large losses of inorganic  
740 nitrogen from tropical rainforests suggest a lack of nitrogen limitation. *Ecol Lett* 15:9-16.

- 741 40. S. Brown AEL, S. Silander, L. Liegel. 1983. Research history and opportunities in the  
742 Luquillo Experimental Forest. Tech Rep SO-44, US Forest Service p. 128.
- 743 41. Gould WA, Gonzalez G, Rivera GC. 2006. Structure and Composition of Vegetation  
744 along an Elevational Gradient in Puerto Rico. *J Veg Sci* 17:653-664.
- 745 42. Aide TM, Zimmerman JK, Herrera L, Rosario M, Serrano M. 1995. Forest recovery in  
746 abandoned tropical pastures in Puerto Rico. *Forest Ecology and Management* 77:77-86.
- 747 43. Weaver PLG, W. A. 2013. Forest vegetation along environmental gradients in  
748 northeastern Puerto Rico. Pages 43-66 in G. González, M. R. Willig, and R. B. Waide,  
749 editors. *Ecological gradient analyses in a tropical landscape. Ecological Bulletins* 54.  
750 Wiley-Blackwell, Hoboken, NJ. 2013.
- 751 44. Ping C-LM, G. J.; Stiles, C. A.; Gonzalez, G. 2013. Soil characteristics, carbon stores,  
752 and nutrient distribution in eight forest types along an elevational gradient, eastern Puerto  
753 Rico. Pages 67-86 in G. González, M. R. Willig, and R. B. Waide, editors. *Ecological*  
754 *gradient analyses in a tropical landscape. Ecological Bulletins* 54. Wiley-Blackwell,  
755 Hoboken, NJ. 2013.
- 756 45. González G, R. Willig M, Waide R. 2013. *Ecological gradient analyses in a tropical*  
757 *landscape: multiple perspectives and emerging themes, vol 54.*
- 758 46. González G, Lodge DJ. 2017. *Soil Biology Research across Latitude, Elevation and*  
759 *Disturbance Gradients: A Review of Forest Studies from Puerto Rico during the Past 25*  
760 *Years. Forests* 8.
- 761 47. Van Beusekom AE, González G, Rivera MM. 2014. Short-Term Precipitation and  
762 Temperature Trends along an Elevation Gradient in Northeastern Puerto Rico. *Earth*  
763 *Interactions* 19:1-33.
- 764 48. Liptzin D, Silver Whendee L. 2015. Spatial patterns in oxygen and redox sensitive  
765 biogeochemistry in tropical forest soils. *Ecosphere* 6:1-14.
- 766 49. Hall SJ, Liptzin D, Buss HL, DeAngelis K, Silver WL. 2016. Drivers and patterns of iron  
767 redox cycling from surface to bedrock in a deep tropical forest soil: a new conceptual  
768 model. *Biogeochemistry* 130:177-190.
- 769 50. DeAngelis KM, Chivian D, Fortney JL, Arkin AP, Simmons B, Hazen TC, Silver WL.  
770 2013. Changes in microbial dynamics during long-term decomposition in tropical forests.  
771 *Soil Biol Biochem* 66:60-68.
- 772 51. Waldrop MP, Balsler TC, Firestone MK. 2000. Linking microbial community  
773 composition to function in a tropical soil. *Soil Biol Biochem* 32:1837-1846.
- 774 52. Templer Pamela H, Silver Whendee L, Pett-Ridge J, Kristen MD, Firestone Mary K.  
775 2008. Plant and microbial controls on nitrogen retention and loss in a humid tropical  
776 forest. *Ecology* 89:3030-3040.

- 777 53. Cantrell SA, Lodge DJ, Cruz CA, Garcia LM, Perez-Jimenez JR, Molina M. 2013.  
778 Differential abundance of microbial functional groups along the elevation gradient from  
779 the coast to the Luquillo Mountains, p 87-100, *Ecological Bulletins* **54**, vol **54**.
- 780 54. Lammel DR, Feigl BJ, Cerri CC, Nüsslein K. 2015. Specific microbial gene abundances  
781 and soil parameters contribute to C, N, and greenhouse gas process rates after land use  
782 change in Southern Amazonian Soils. *Front Microbiol* 6:1057.
- 783 55. Jousset A, Bienhold C, Chatzinotas A, Gallien L, Gobet A, Kurm V, Küsel K, Rillig MC,  
784 Rivett DW, Salles JF, van der Heijden MGA, Youssef NH, Zhang X, Wei Z, Hol WHG.  
785 2017. Where less may be more: how the rare biosphere pulls ecosystems strings. *ISME J*  
786 11:853.
- 787 56. Orellana LH, Chee-Sanford JC, Sanford RA, Löffler FE, Konstantinidis KT. 2017. Year-  
788 round shotgun metagenomes reveal stable microbial communities in agricultural soils and  
789 novel ammonia oxidizers responding to fertilization. *Applied and Environmental*  
790 *Microbiology*.
- 791 57. Johnston ER, Rodriguez-R LM, Luo C, Yuan MM, Wu L, He Z, Schuur EAG, Luo Y,  
792 Tiedje JM, Zhou J, Konstantinidis KT. 2016. Metagenomics Reveals Pervasive Bacterial  
793 Populations and Reduced Community Diversity across the Alaska Tundra Ecosystem.  
794 *Front Microbiol* 7:579.
- 795 58. Caro-Quintero A, Konstantinidis KT. 2012. Bacterial species may exist, metagenomics  
796 reveal. *Environ Microbiol* 14:347-355.
- 797 59. Luo C, Rodriguez RL, Johnston ER, Wu L, Cheng L, Xue K, Tu Q, Deng Y, He Z, Shi  
798 JZ, Yuan MM, Sherry RA, Li D, Luo Y, Schuur EA, Chain P, Tiedje JM, Zhou J,  
799 Konstantinidis KT. 2014. Soil microbial community responses to a decade of warming as  
800 revealed by comparative metagenomics. *Appl Environ Microbiol* 80:1777-86.
- 801 60. Rodriguez-R LM, Konstantinidis KT. 2014. Nonpareil: a redundancy-based approach to  
802 assess the level of coverage in metagenomic datasets. *Bioinformatics* 30:629-635.
- 803 61. Zhang X, Johnston ER, Li L, Konstantinidis KT, Han X. 2017. Experimental warming  
804 reveals positive feedbacks to climate change in the Eurasian Steppe. *ISME J* 11:885-895.
- 805 62. Rodriguez-R LM, Konstantinidis KT. 2016. The enveomics collection: a toolbox for  
806 specialized analyses of microbial genomes and metagenomes. *PeerJ Preprints* 4:e1900v1.
- 807 63. Rodriguez RL, Gunturu S, Harvey WT, Rossello-Mora R, Tiedje JM, Cole JR,  
808 Konstantinidis KT. 2018. The Microbial Genomes Atlas (MiGA) webserver: taxonomic  
809 and gene diversity analysis of Archaea and Bacteria at the whole genome level. *Nucleic*  
810 *Acids Res* 46:W282-w288.
- 811 64. Bruijnzeel LA, Proctor J. Hydrology and Biogeochemistry of Tropical Montane Cloud  
812 Forests: What Do We Really Know?, p 38-78. *In* Hamilton LS, Juvik JO, Scatena FN  
813 (ed), Springer US,

- 814 65. Song L, Lu H-Z, Xu X-L, Li S, Shi X-M, Chen X, Wu Y, Huang J-B, Chen Q, Liu S, Wu  
815 C-S, Liu W-Y. 2016. Organic nitrogen uptake is a significant contributor to nitrogen  
816 economy of subtropical epiphytic bryophytes. *Scientific Reports* 6:30408.
- 817 66. Cusack DF, Silver W, McDowell WH. 2009. Biological Nitrogen Fixation in Two  
818 Tropical Forests: Ecosystem-Level Patterns and Effects of Nitrogen Fertilization.  
819 *Ecosystems* 12:1299-1315.
- 820 67. Hedin LO, Brookshire ENJ, Menge DNL, Barron AR. 2009. The Nitrogen Paradox in  
821 Tropical Forest Ecosystems. *Annual Review of Ecology, Evolution, and Systematics*  
822 40:613-635.
- 823 68. Sanford RA, Wagner DD, Wu Q, Chee-Sanford JC, Thomas SH, Cruz-García C,  
824 Rodríguez G, Massol-Deyá A, Krishnani KK, Ritalahti KM, Nissen S, Konstantinidis  
825 KT, Löffler FE. 2012. Unexpected nondenitrifier nitrous oxide reductase gene diversity  
826 and abundance in soils. *Proceedings of the National Academy of Sciences* 109:19709.
- 827 69. Johnston MH. 1992. Soil-Vegetation Relationships in a Tabonuco Forest Community in  
828 the Luquillo Mountains of Puerto Rico. *Journal of Tropical Ecology* 8:253-263.
- 829 70. Weaver PL. 1995. The Colorado and Dwarf Forests of Puerto Rico's Luquillo Mountains,  
830 p 109-141. *In* Lugo AE, Lowe C (ed), *Tropical Forests: Management and Ecology*  
831 doi:10.1007/978-1-4612-2498-3\_5. Springer New York, New York, NY.
- 832 71. Rodríguez-Minguela CM, Apajalahti JHA, Chai B, Cole JR, Tiedje JM. 2009. Worldwide  
833 Prevalence of Class 2 Integrases outside the Clinical Setting Is Associated with Human  
834 Impact. *Applied and Environmental Microbiology* 75:5100-5110.
- 835 72. Griffiths RI, Whiteley AS, O'Donnell AG, Bailey MJ. 2000. Rapid method for  
836 coextraction of DNA and RNA from natural environments for analysis of ribosomal  
837 DNA- and rRNA-based microbial community composition. *Applied and environmental*  
838 *microbiology* 66:5488-5491.
- 839 73. Tsai YL, Olson BH. 1991. Rapid method for direct extraction of DNA from soil and  
840 sediments. *Applied and environmental microbiology* 57:1070-1074.
- 841 74. Cox MP, Peterson DA, Biggs PJ. 2010. SolexaQA: At-a-glance quality assessment of  
842 Illumina second-generation sequencing data. *BMC Bioinformatics* 11:485.
- 843 75. Peng Y, Leung HC, Yiu SM, Chin FY. 2012. IDBA-UD: a de novo assembler for single-  
844 cell and metagenomic sequencing data with highly uneven depth. *Bioinformatics*  
845 28:1420-8.
- 846 76. Zhu W, Lomsadze A, Borodovsky M. 2010. Ab initio gene identification in metagenomic  
847 sequences. *Nucleic Acids Res* 38:e132.
- 848 77. Camacho C, Coulouris G, Avagyan V, Ma N, Papadopoulos J, Bealer K, Madden TL.  
849 2009. BLAST+: architecture and applications. *BMC Bioinformatics* 10:421-421.



- 850 78. Wu Y-W, Tang Y-H, Tringe SG, Simmons BA, Singer SW. 2014. MaxBin: an automated  
851 binning method to recover individual genomes from metagenomes using an expectation-  
852 maximization algorithm. *Microbiome* 2:26.
- 853 79. Parks DH, Imelfort M, Skennerton CT, Hugenholtz P, Tyson GW. 2015. CheckM:  
854 assessing the quality of microbial genomes recovered from isolates, single cells, and  
855 metagenomes. *Genome Research* 25:1043-1055.
- 856 80. Konstantinidis KT, DeLong EF. 2008. Genomic patterns of recombination, clonal  
857 divergence and environment in marine microbial populations. *ISME J*  
858 doi:<http://www.nature.com/ismej/journal/v2/n10/supinfo/ismej200862s1.html>.
- 859 81. Bairoch A, Apweiler R. 2000. The SWISS-PROT protein sequence database and its  
860 supplement TrEMBL in 2000. *Nucleic Acids Res* 28:45-48.
- 861 82. Overbeek R, Olson R, Pusch GD, Olsen GJ, Davis JJ, Disz T, Edwards RA, Gerdes S,  
862 Parrello B, Shukla M, Vonstein V, Wattam AR, Xia F, Stevens R. 2014. The SEED and  
863 the Rapid Annotation of microbial genomes using Subsystems Technology (RAST).  
864 *Nucleic Acids Res* 42:D206-D214.
- 865 83. Rho M, Tang H, Ye Y. 2010. FragGeneScan: predicting genes in short and error-prone  
866 reads. *Nucleic Acids Res* 38:e191-e191.
- 867 84. Ondov BD, Treangen TJ, Melsted P, Mallonee AB, Bergman NH, Koren S, Phillippy  
868 AM. 2016. Mash: fast genome and metagenome distance estimation using MinHash.  
869 *Genome Biology* 17:132.
- 870 85. Oksanen J. 2011. Multivariate analysis of ecological communities in R: vegan tutorial  
871 v.2.02. <http://ccoulufi/~jarioksa/opetus/metodi/vegantutorpdf>.
- 872 86. Su X, Pan W, Song B, Xu J, Ning K. 2014. Parallel-META 2.0: Enhanced Metagenomic  
873 Data Analysis with Functional Annotation, High Performance Computing and Advanced  
874 Visualization. *PLOS ONE* 9:e89323.
- 875 87. Edgar RC. 2010. Search and clustering orders of magnitude faster than BLAST.  
876 *Bioinformatics* 26:2460-2461.
- 877 88. McDonald D, Price MN, Goodrich J, Nawrocki EP, DeSantis TZ, Probst A, Andersen  
878 GL, Knight R, Hugenholtz P. 2012. An improved Greengenes taxonomy with explicit  
879 ranks for ecological and evolutionary analyses of bacteria and archaea. *The ISME Journal*  
880 6:610-618.
- 881 89. Kuczynski J, Stombaugh J, Walters WA, González A, Caporaso JG, Knight R. 2011.  
882 Using QIIME to analyze 16S rRNA gene sequences from Microbial Communities.  
883 *Current protocols in bioinformatics / editorial board, Andreas D Baxevanis [et al]*  
884 CHAPTER:Unit10.7-Unit10.7.

- 885 90. Caporaso JG, Kuczynski J, Stombaugh J, Bittinger K, Bushman FD, Costello EK, Fierer  
886 N, Peña AG, Goodrich JK, Gordon JI, Huttley GA, Kelley ST, Knights D, Koenig JE,  
887 Ley RE, Lozupone CA, McDonald D, Muegge BD, Pirrung M, Reeder J, Sevinsky JR,  
888 Turnbaugh PJ, Walters WA, Widmann J, Yatsunencko T, Zaneveld J, Knight R. 2010.  
889 QIIME allows analysis of high-throughput community sequencing data. *Nat Methods*  
890 7:335.
- 891 91. Orellana LH, Rodriguez-R LM, Konstantinidis KT. 2017. ROCKER: accurate detection  
892 and quantification of target genes in short-read metagenomic data sets by modeling  
893 sliding-window bitscores. *Nucleic Acids Res* 45:e14-e14.
- 894 92. Sievers F, Wilm A, Dineen D, Gibson TJ, Karplus K, Li W, Lopez R, McWilliam H,  
895 Remmert M, Söding J, Thompson JD, Higgins DG. 2011. Fast, scalable generation of  
896 high-quality protein multiple sequence alignments using Clustal Omega. *Molecular*  
897 *Systems Biology* 7.
- 898 93. Stamatakis A. 2014. RAxML version 8: a tool for phylogenetic analysis and post-analysis  
899 of large phylogenies. *Bioinformatics* 30:1312-1313.
- 900 94. Katoh K, Misawa K, Kuma K-i, Miyata T. 2002. MAFFT: a novel method for rapid  
901 multiple sequence alignment based on fast Fourier transform. *Nucleic Acids Res*  
902 30:3059-3066.
- 903 95. Letunic I, Bork P. 2016. Interactive tree of life (iTOL) v3: an online tool for the display  
904 and annotation of phylogenetic and other trees. *Nucleic Acids Res* 44:W242-5.
- 905 96. Luo C, Rodriguez-R LM, Konstantinidis KT. 2014. MyTaxa: an advanced taxonomic  
906 classifier for genomic and metagenomic sequences. *Nucleic Acids Res* 42:e73-e73.  
907
